# Supplementary material
Source: MDPI journal article supplement (https://www.mdpi.com/1999-4907/9/8/447)
Supplement: s1 [file s1]

# Supplementary Materials: Tradeoffs in timber, carbon, and cash flow under alternative management systems for Douglas-fir in the Pacific Northwest

David D. Diaz, Sara Lorenzo, Gregory J. Ettl, and Brent Davies

*Modifications to FVS growth-and-yield: Cross-validation with yield curves, permanent plots, and FIA data*

Ten simulations were conducted for each level of 50-year Site Index ranging from 22.86–39.62 m (75–130 ft) in 1.52 m (5 ft) intervals (i.e., 75, 80, 85... 130 ft), covering Site Classes II – IV. Simulations used default settings for the FVS Pacific Northwest Coast (PN) Variant [1], and were iteratively adjusted through trial-and-error, resulting in the modifications below. Stochastic variability was introduced into the FVS model using the RANNSEED keyword. Stands were established with 1,075 trees per hectare (435 trees per acre (TPA)) of Douglas-fir with 85% survival rate.

*Growth and mortality adjustments*

Basal area increment was adjusted to a fraction of default rates using the BAIMULT keyword, and Maximum Stand Density Index, which governs density-driven mortality in FVS-PN was set at:

**Table S1.** FVS keyword modifications

| Site Class | IV  | III | II  |
|------------|-----|-----|-----|
| SDIMAX     | 450 | 450 | 550 |
| BAIMULT    | 0.3 | 0.5 | 0.5 |

For all stands, background mortality of large trees was modified to 5% of default mortality rates until the age of 30 using the MORTMULT keyword. At age 30, background mortality rates are restored to 100% of FVS-PN defaults. MORTMULT modifications do not affect density-related mortality, which is governed by the SDIMAX keywords described above.

*Timber volume adjustments*

By default, FVS calculates cubic and boardfoot volumes using equations from the National Volume Estimator Library (NVEL), which is documented by Wang [2]. The NVEL boardfoot volume were modified using the BFDEFECT keyword in FVS to provide timber volume estimates more consistent with field experiences and inventory census such as the US Forest Service Forest Inventory Analysis (FIA), which place a greater emphasis on quantifying merchantable timber volume using regional equations. Adjustment factors to NVEL volumes were determined by computing Scribner boardfoot volume for all trees  $\geq 15''$  DBH of common merchantable species from FIA plots in western Oregon and western Washington using two separate methods: the NVEL equations, and the equations utilized by the FIA program [3]. In general, NVEL overestimated Scribner boardfoot volume compared to FIA equations, ranging from 5% in 15–20" red alder trees up to 49% in western redcedar. The correction factors used are shown in **Table S2**.

Based on comparisons to yields of Douglas-fir using the Stand Management Cooperative's (SMC) Yield Calculator [4], we capped the Scribner volume adjustment factor at 25% for 25.4 cm (10 in) DBH trees. This allowed for standing boardfoot volumes to follow rapid plantation development consistent with SMC reference plantation network, while allowing volume corrections in larger trees that bring the yield curves down into the range of the 75<sup>th</sup> percentile of FIA observations as the stands reach 60–80 years old, and near the median value of FIA observations around 100 years old. This approach to boardfoot volume adjustments implies that the advanced volume growth observed in

young plantations does not persist beyond the ages at which these stands are commonly harvested in contemporary production forestry in western Oregon and Washington. This is intended to be a conservative assumption and may underestimate the boardfoot volume that might be achieved if contemporary plantations were retained through longer rotations.

**Table S2.** Mean percent defect incorporated into FVS for each species diameter at breast height

| Species                                            | 25.4 cm (10") |        | 38.1 cm (15") |        | 50.8 cm (20") |       | 63.5cm (25") |        |
|----------------------------------------------------|---------------|--------|---------------|--------|---------------|-------|--------------|--------|
|                                                    | Defect        | Count  | Defect        | Count  | Defect        | Count | Defect       | Count  |
| <i>Pseudotsuga menziesii</i><br>(Douglas-fir)      | 50%           | 23,575 | 33%           | 10,838 | 28%           | 5,443 | 33%          | 31,043 |
| <i>Tsuga heterophylla</i><br>(western hemlock)     | 42%           | 9,554  | 22%           | 4,135  | 18%           | 1,905 | 28%          | 7,075  |
| <i>Abies amabilis</i><br>(Pacific silver fir)      | 44%           | 4,241  | 22%           | 1,778  | 16%           | 861   | 15%          | 2,900  |
| <i>Alnus rubra</i><br>(red alder)                  | 37%           | 3,497  | 5%            | 1,169  | 11%           | 264   | 22%          | 112    |
| <i>Thuja plicata</i><br>(western redcedar)         | 56%           | 1,673  | 45%           | 912    | 44%           | 489   | 49%          | 3,413  |
| <i>Abies procera</i><br>(noble fir)                | 47%           | 706    | 24%           | 334    | 18%           | 192   | 14%          | 765    |
| <i>Abies grandis</i><br>(grand fir)                | 39%           | 562    | 18%           | 271    | 14%           | 131   | 14%          | 255    |
| <i>Picea sitchensis</i><br>(Sitka spruce)          | 54%           | 324    | 37%           | 182    | 34%           | 107   | 31%          | 600    |
| <i>Callitropsis nootkatensis</i><br>(yellow cedar) | 57%           | 226    | 46%           | 93     | 48%           | 45    | 52%          | 203    |

#### General notes about the following graphs and yield tables

In all graphs shown below, the FVS simulations are displayed as gray lines. Blue lines show data from permanent plots in fully-stocked Douglas-fir stands [5,6]. Black lines show published yield curves of Douglas-fir from California to British Columbia [4,7–11]. The red line in each graph represents the median value observed among “conditions” observed in the US Forest Service’s Forest Inventory and Analysis (FIA) network of plots from western Oregon and Washington that contained more than 80% of their basal area in Douglas-fir. Site Indices recorded in the FIA data were translated directly into Site Classes for each “condition” (rather than using the cubic volume productivity classes employed by USFS). The red shaded areas around the FIA median line correspond to observations in the 25<sup>th</sup> – 75<sup>th</sup> percentile range (darker red) and the 10<sup>th</sup> – 90<sup>th</sup> percentile range (lighter red). Data from the PNW FIA Database were analyzed using a site index base age of 50 (assuming the majority of base ages actually recorded in the database listing a base age of 100 were incorrect (personal communication, Andy Gray, Washington state coordinator for the FIA program)).

Boardfoot volumes are Scribner 32-foot log scale. Each data source uses different specifications for minimum top diameter inside bark. FVS, FIA, and SMC volumes are up to a 15.24 cm (6") minimum top diameter with a 0.30 m (1') stump. FVS, FIA, and SMC cubic volumes are shown for trees to a 10.16 cm (4") minimum top diameter inside bark with a 0.30 m (1') stump, while cubic volumes from other yield table publications are showing total cubic volume including top and stump.

The Yield Tables are direct outputs from the simulations conducted using the modified version of FVS-PN. The values in each cell represent the mean value for the metric being among the 10 simulations of each Site Index.

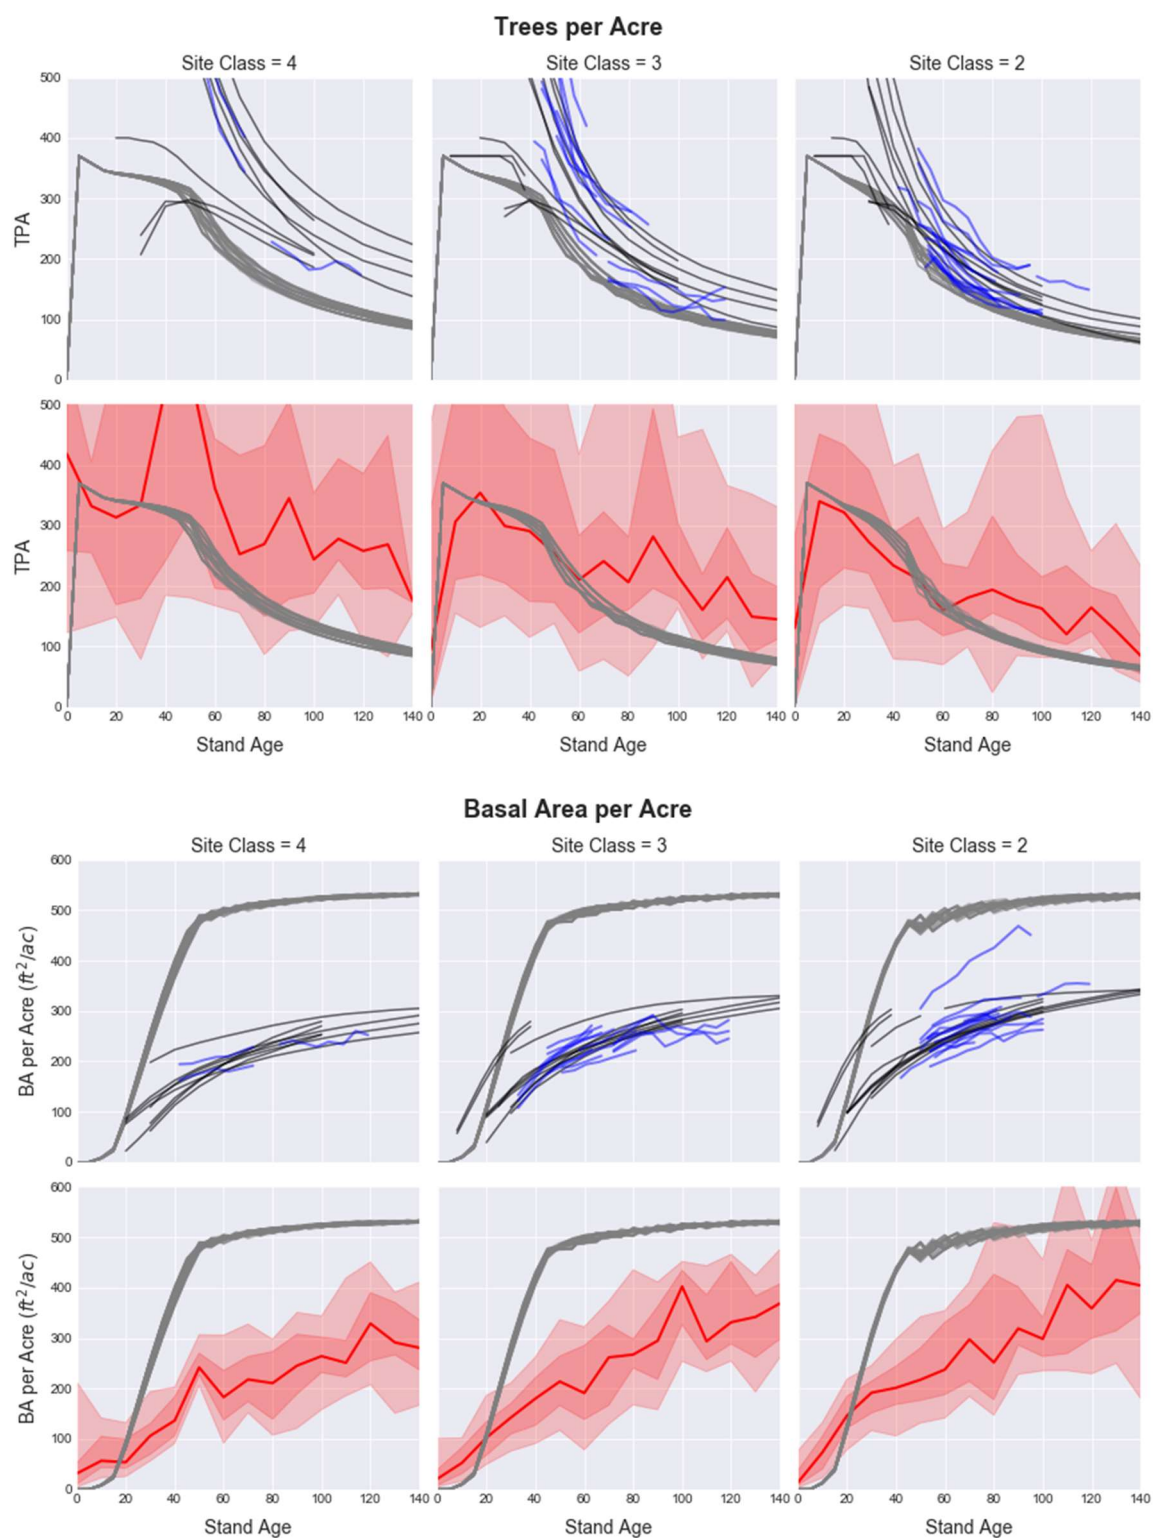

**Figure S1.** Default FVS Parameterization comparing PN variant output to measured stands (Part 1 of 3): Trees Per Acre (TPA, top 6 graphs) and Basal Area (BA) per Acre (bottom 6 graphs). Gray lines show FVS simulations. Blue lines show permanent plot data. Black lines show published yield curves. Red line shows median, and bands show 25th-75th and 10th-90th percentile range of FIA data.

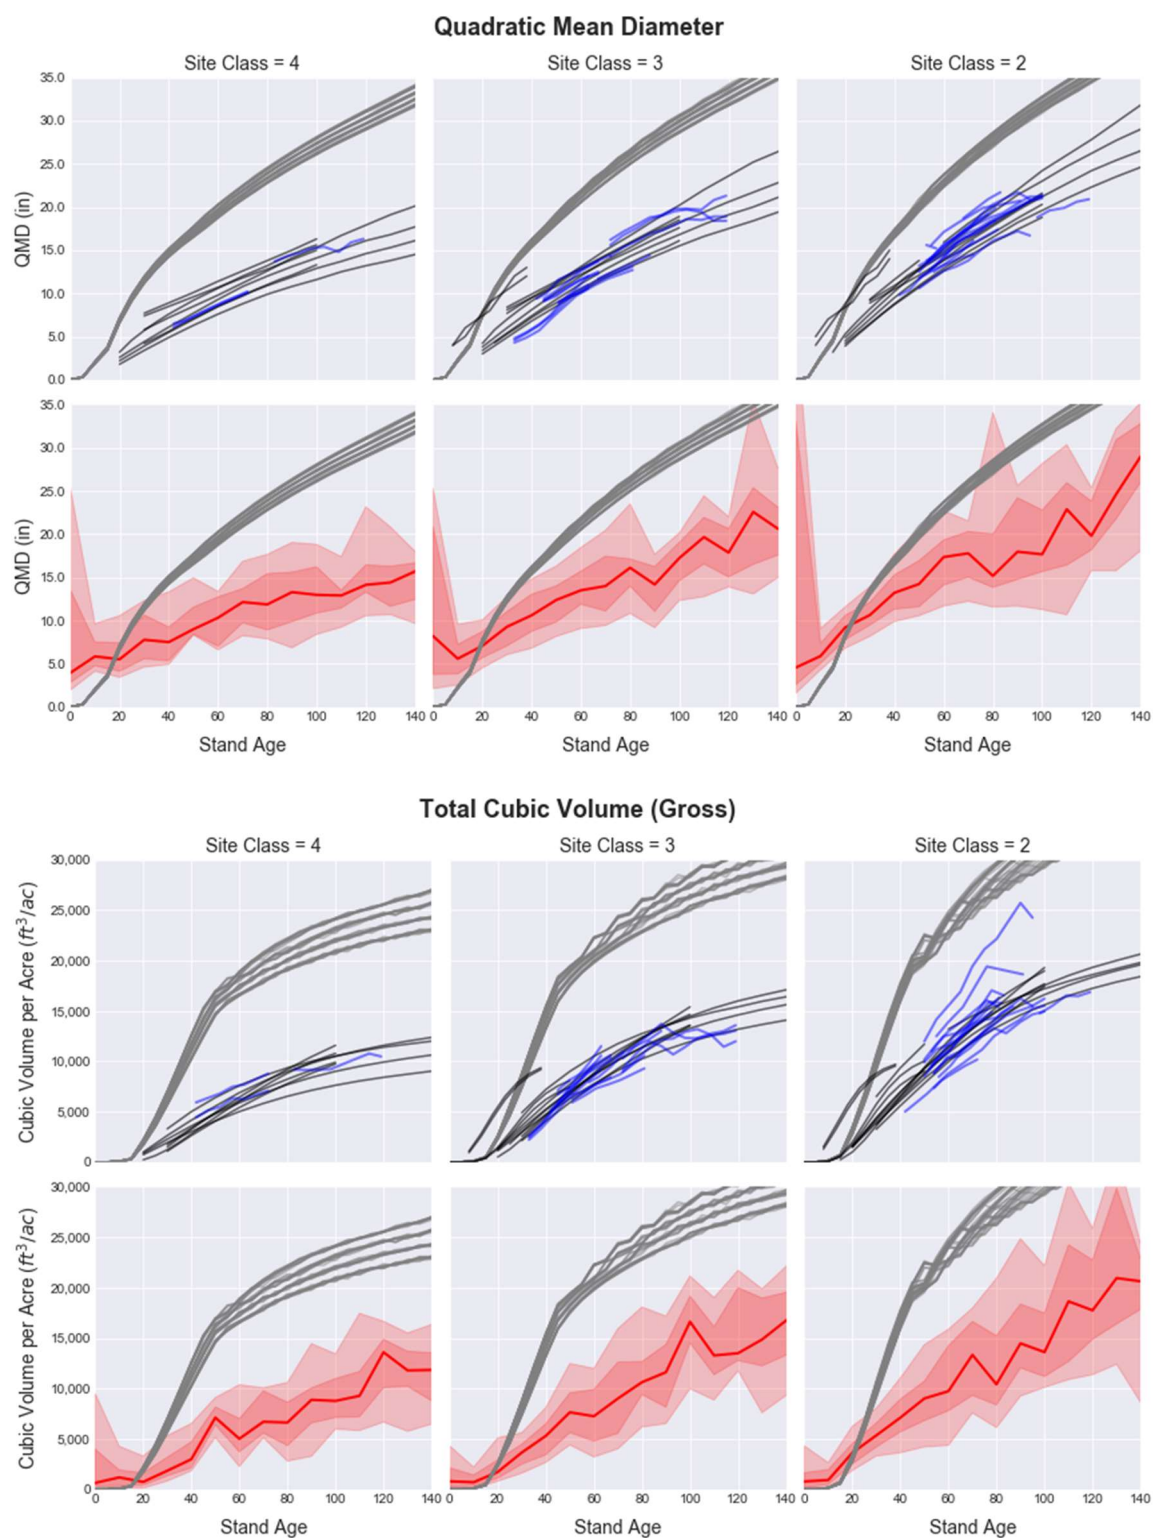

**Figure S2.** Default FVS Parameterization (Part 2 of 3): Quadratic Mean Diameter (QMD, top 6 graphs) and Total Cubic Volume (bottom 6 graphs). Gray lines show FVS simulations. Blue lines show permanent plot data. Black lines show published yield curves. Red line shows median, and bands show 25th-75th and 10th-90th percentile range of FIA data.



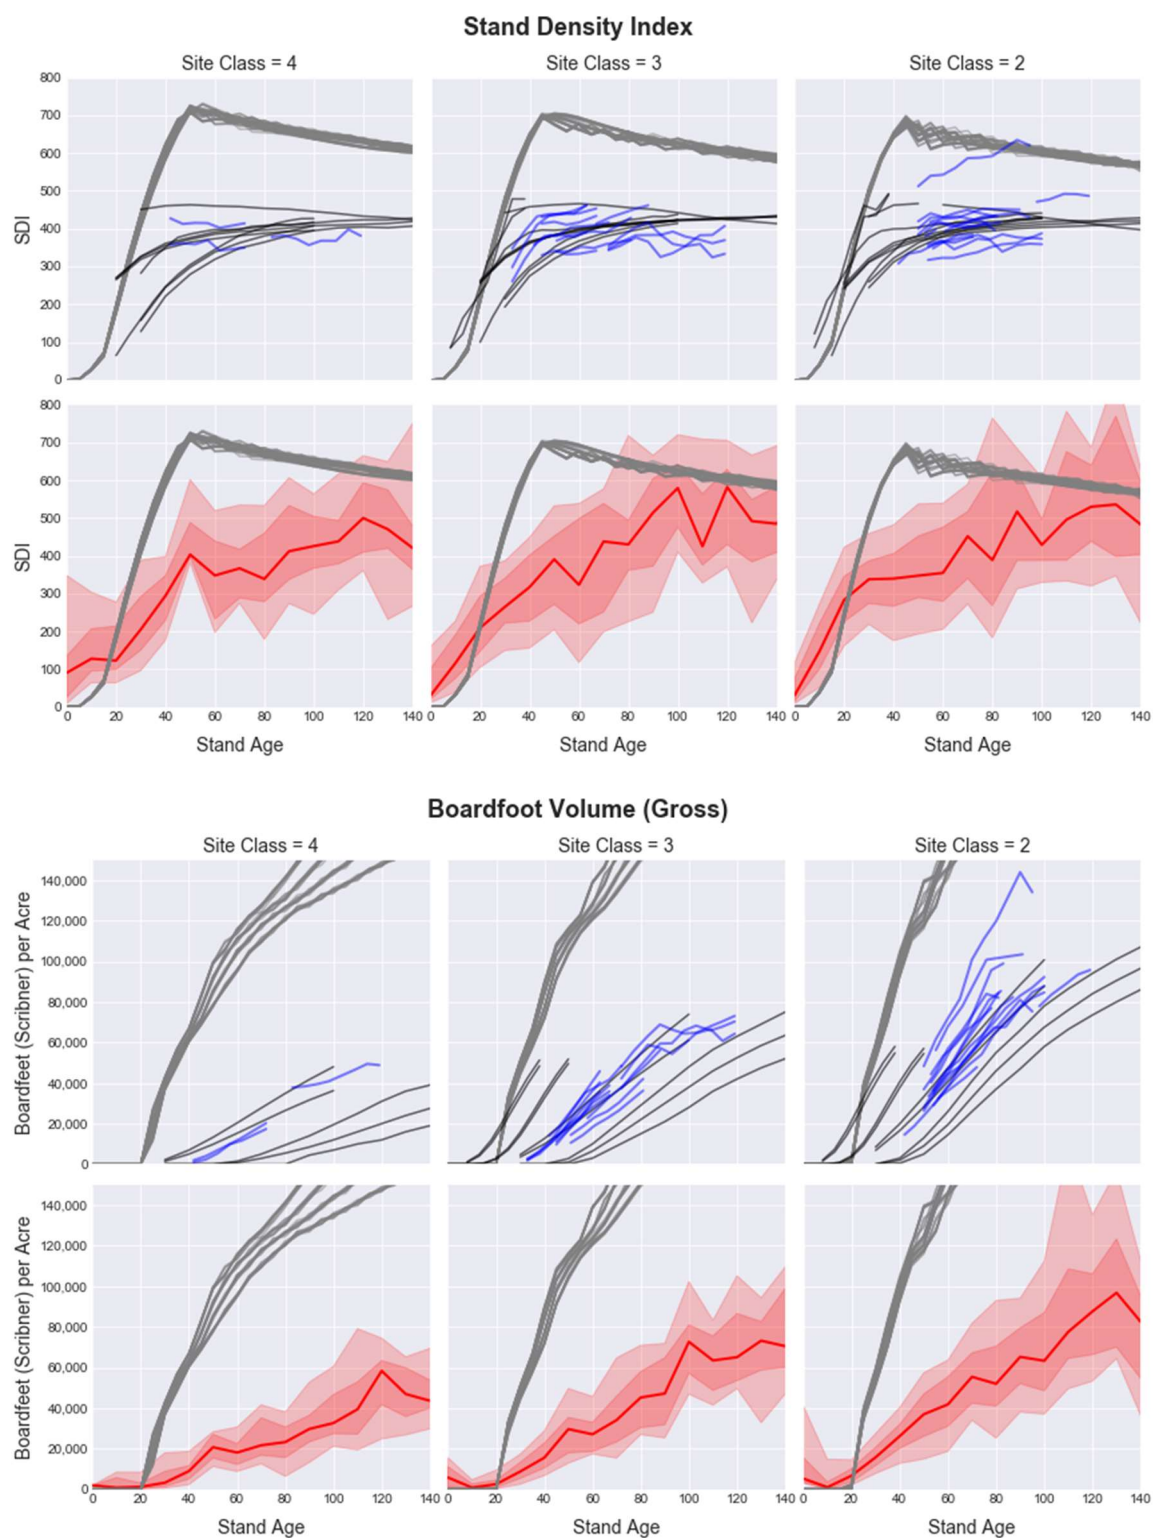

**Figure S3.** Default FVS Parameterization (Part 3 of 3): Stand Density Index (SDI, top 6 graphs) and Gross Boardfoot Volume (bottom 6 graphs). Gray lines show FVS simulations. Blue lines show permanent plot data. Black lines show published yield curves. Red line shows median, and bands show 25th-75th and 10th-90th percentile range of FIA data.

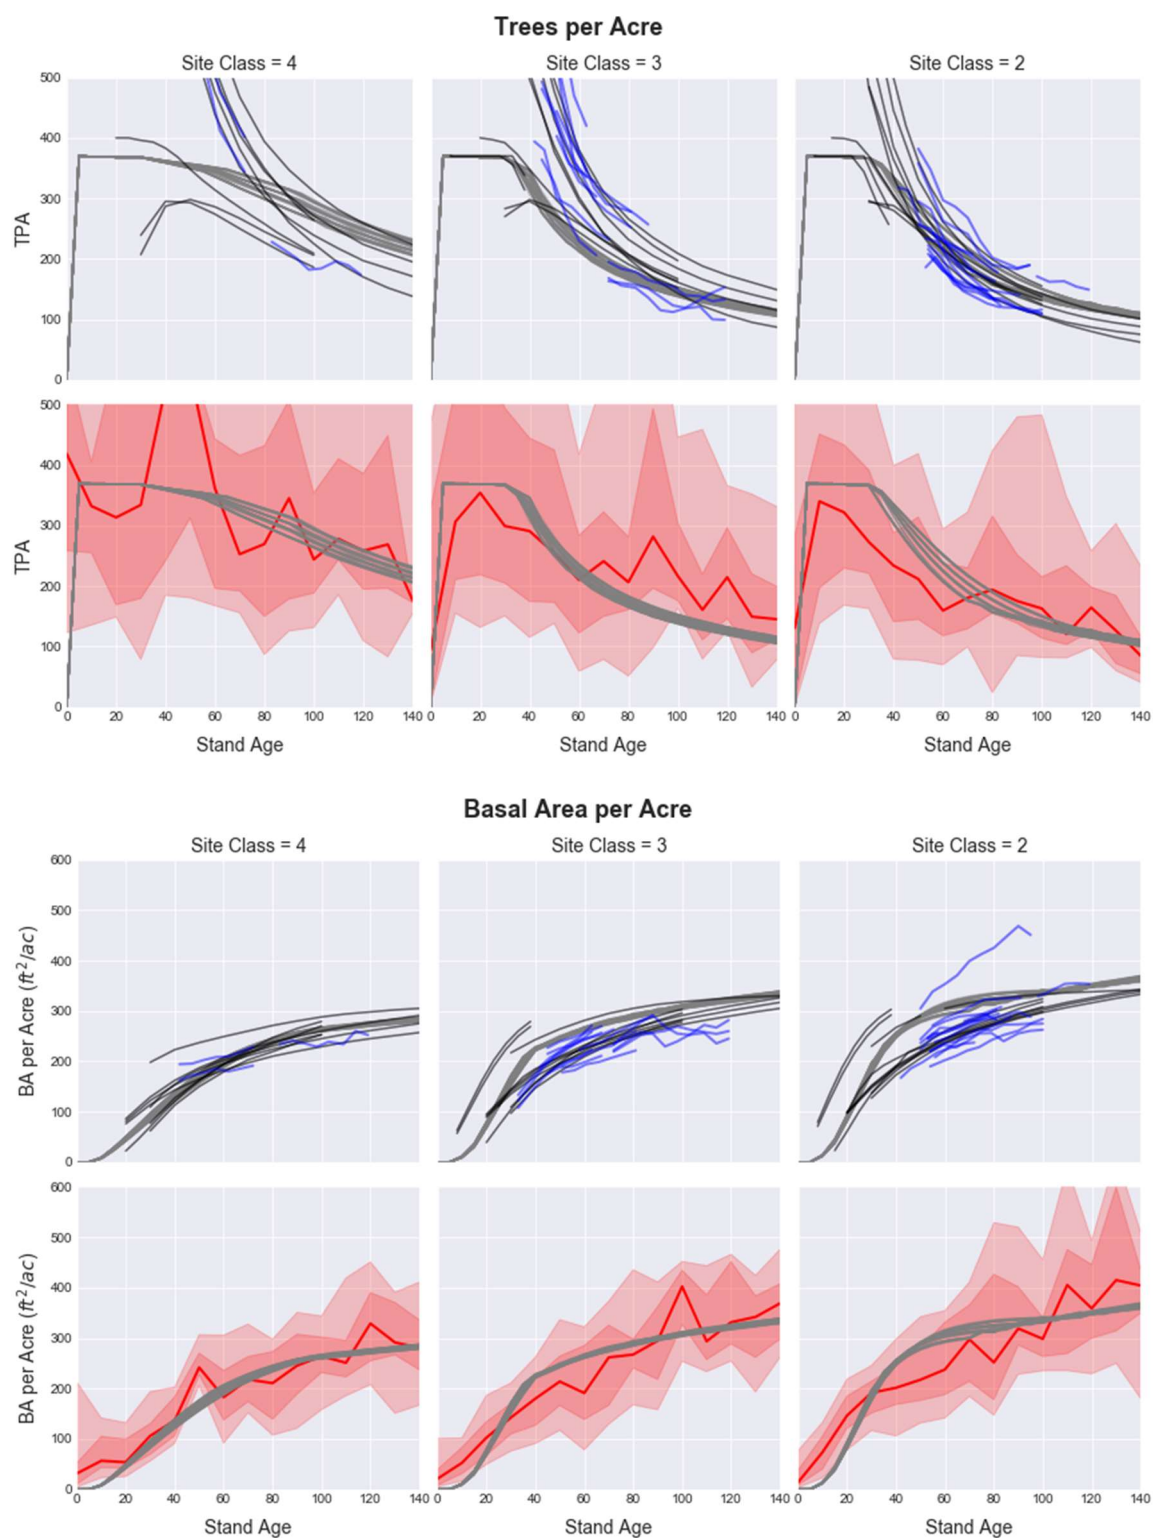

**Figure S4.** Modified FVS Parameterization (Part 1 of 3): Trees Per Acre (TPA, top 6 graphs) and Basal Area (BA) per Acre (bottom 6 graphs). Gray lines show FVS simulations. Blue lines show permanent plot data. Black lines show published yield curves. Red line shows median, and bands show 25th-75th and 10th-90th percentile range of FIA data.

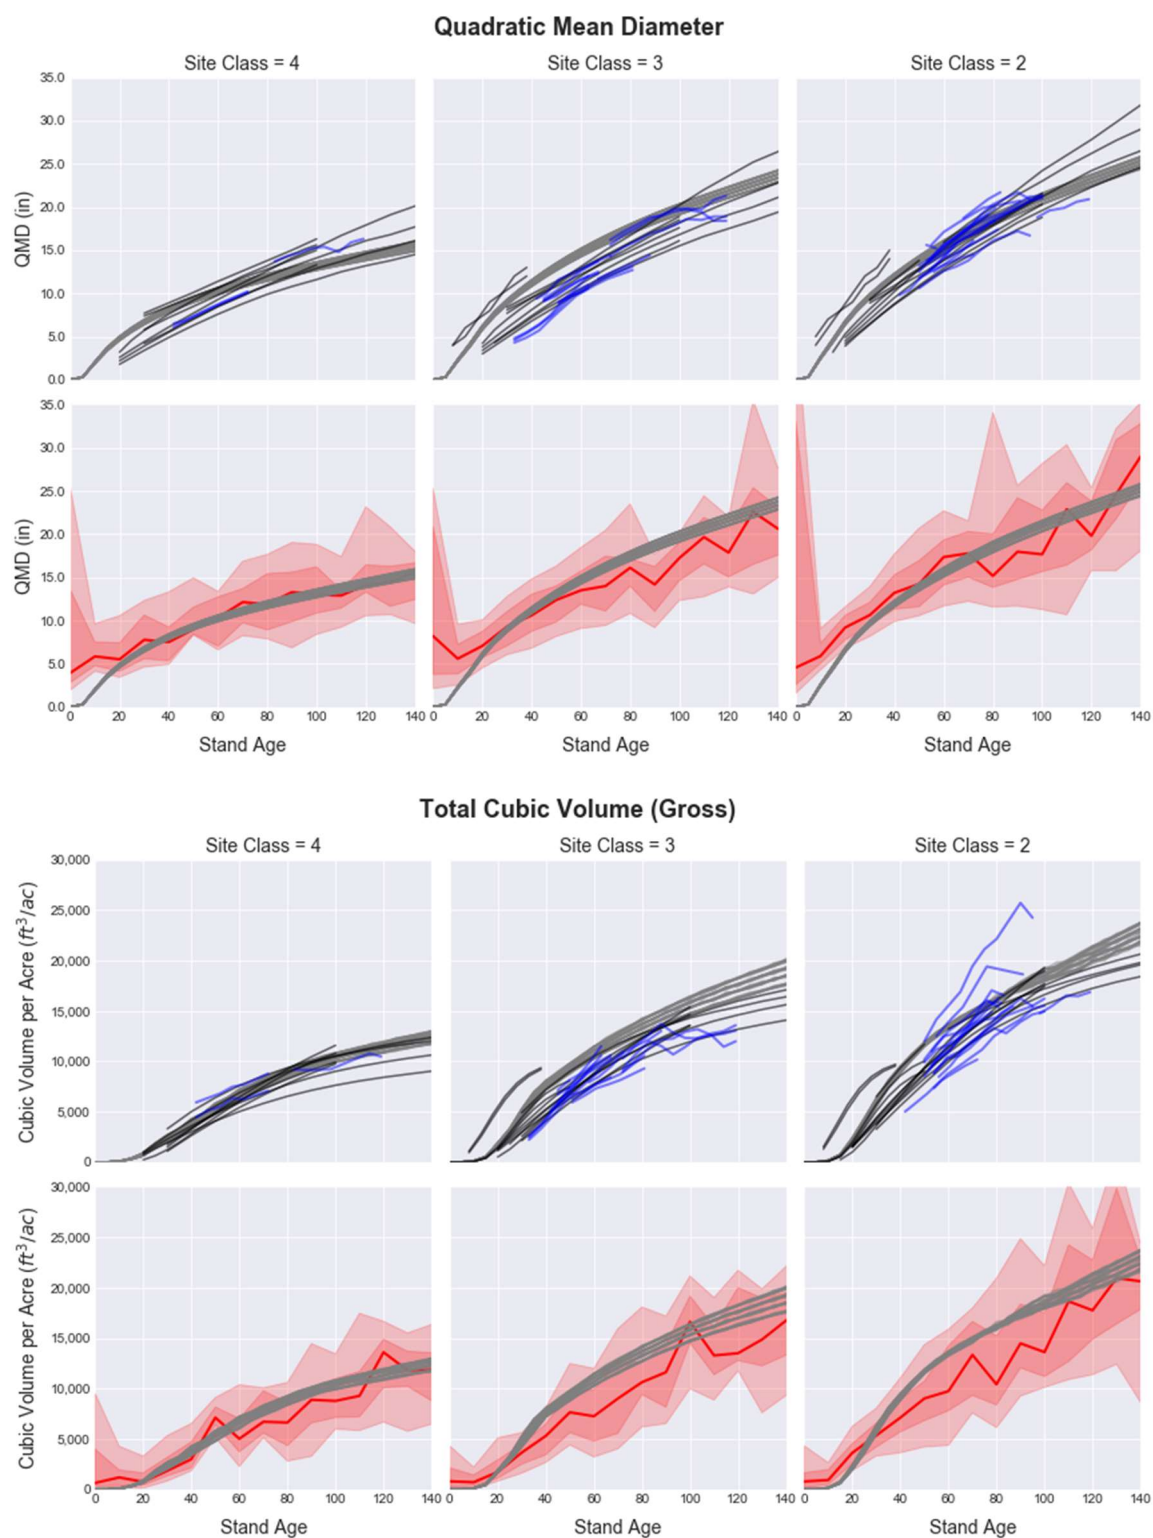

**Figure S5.** Modified FVS Parameterization (Part 2 of 3): Quadratic Mean Diameter (QMD, top 6 graphs) and Total Cubic Volume (bottom 6 graphs). Gray lines show FVS simulations. Blue lines show permanent plot data. Black lines show published yield curves. Red line shows median, and bands show 25th-75th and 10th-90th percentile range of FIA data.

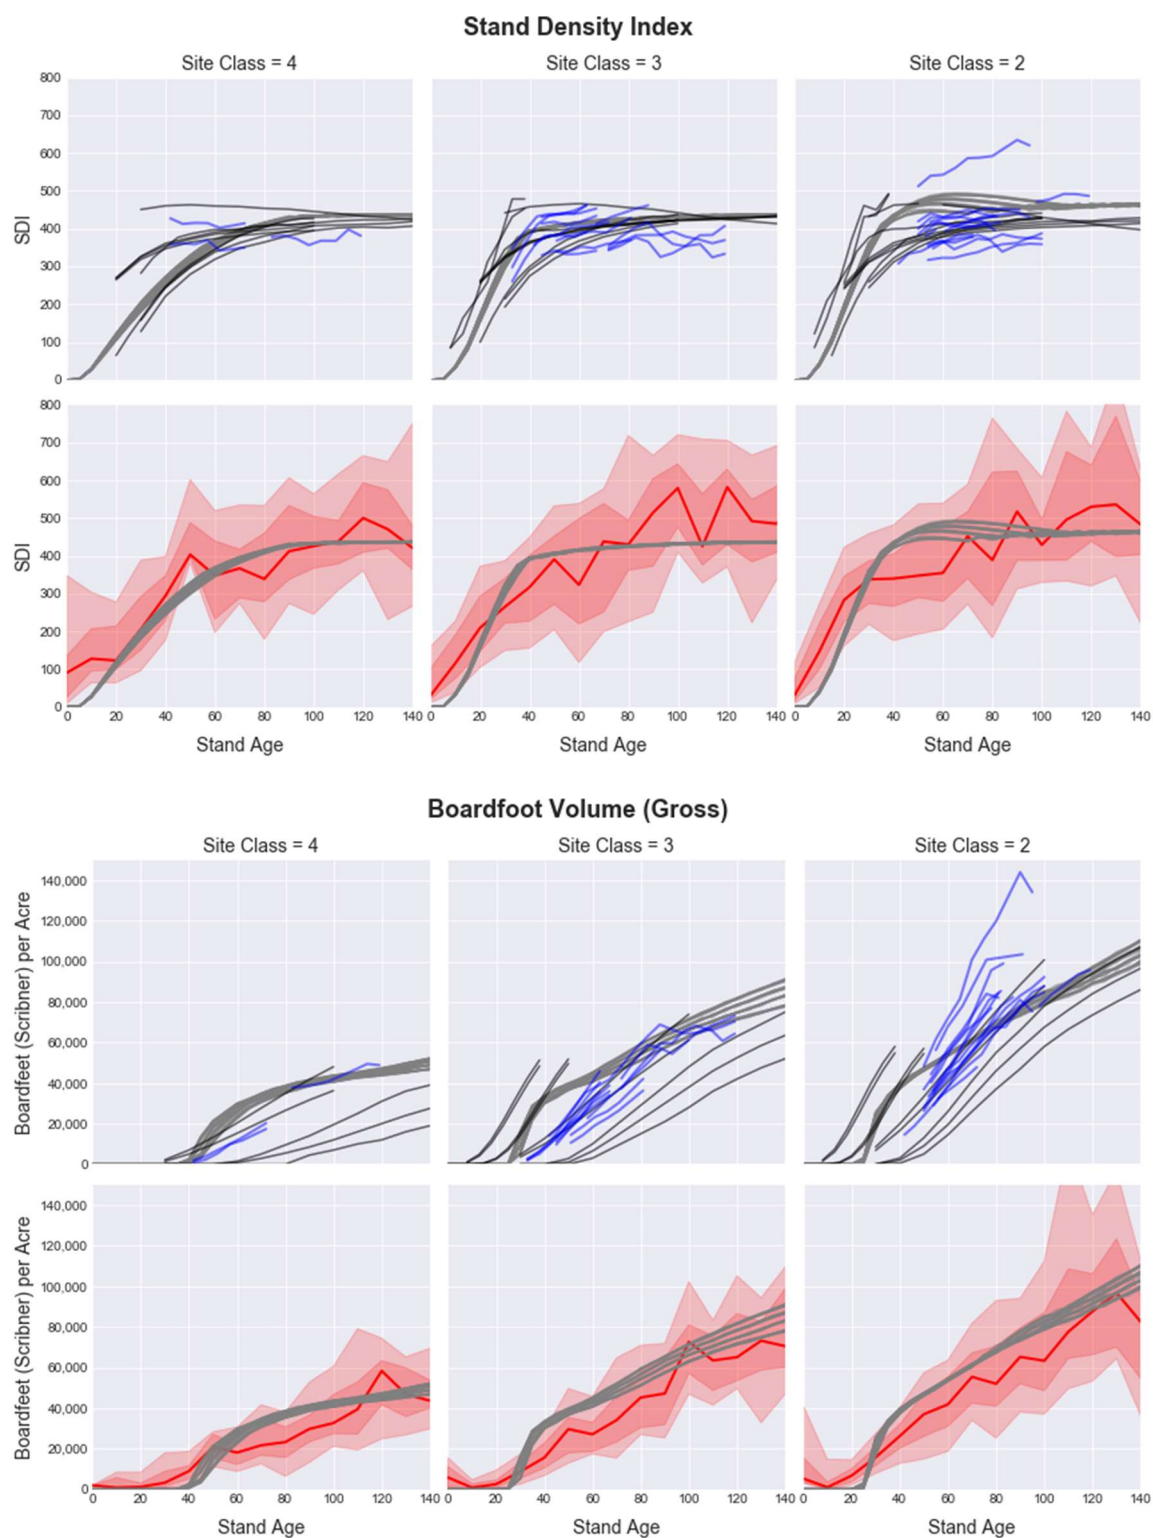

**Figure S6.** Modified FVS Parameterization (Part 3 of 3): Stand Density Index (SDI, top 6 graphs) and Gross Boardfoot Volume (bottom 6 graphs). Gray lines show FVS simulations. Blue lines show permanent plot data. Black lines show published yield curves. Red line shows median, and bands show 25th-75th and 10th-90th percentile range of FIA data.



**Table S3.** Yield Table: Dominant Height (feet), 40 tallest trees per acre.

| Age | Douglas-fir 50-year Site Index (King's) |     |     |     |     |     |     |     |     |     |     |     |
|-----|-----------------------------------------|-----|-----|-----|-----|-----|-----|-----|-----|-----|-----|-----|
|     | 75                                      | 80  | 85  | 90  | 95  | 100 | 105 | 110 | 115 | 120 | 125 | 130 |
| 20  | 37                                      | 38  | 40  | 42  | 44  | 46  | 48  | 49  | 51  | 53  | 55  | 57  |
| 25  | 44                                      | 46  | 49  | 51  | 54  | 56  | 59  | 61  | 63  | 65  | 68  | 70  |
| 30  | 51                                      | 54  | 57  | 60  | 63  | 66  | 68  | 71  | 74  | 77  | 80  | 82  |
| 35  | 58                                      | 61  | 64  | 67  | 71  | 74  | 78  | 81  | 84  | 88  | 91  | 93  |
| 40  | 63                                      | 67  | 71  | 74  | 78  | 82  | 86  | 90  | 93  | 97  | 100 | 103 |
| 45  | 68                                      | 73  | 77  | 80  | 85  | 89  | 94  | 98  | 102 | 106 | 109 | 112 |
| 50  | 73                                      | 78  | 82  | 85  | 91  | 96  | 100 | 105 | 109 | 114 | 117 | 120 |
| 55  | 78                                      | 82  | 86  | 89  | 97  | 102 | 107 | 112 | 116 | 121 | 124 | 127 |
| 60  | 82                                      | 87  | 91  | 93  | 102 | 108 | 113 | 118 | 123 | 127 | 131 | 134 |
| 65  | 85                                      | 91  | 95  | 97  | 107 | 113 | 118 | 124 | 128 | 133 | 137 | 140 |
| 70  | 89                                      | 94  | 98  | 100 | 112 | 117 | 123 | 129 | 134 | 138 | 142 | 145 |
| 75  | 92                                      | 97  | 101 | 103 | 116 | 122 | 128 | 134 | 139 | 144 | 147 | 150 |
| 80  | 95                                      | 100 | 104 | 106 | 120 | 126 | 132 | 138 | 144 | 148 | 152 | 155 |
| 85  | 97                                      | 103 | 107 | 109 | 123 | 129 | 136 | 142 | 148 | 153 | 157 | 160 |
| 90  | 100                                     | 106 | 110 | 112 | 126 | 133 | 140 | 146 | 152 | 157 | 161 | 164 |
| 95  | 102                                     | 108 | 112 | 114 | 129 | 136 | 143 | 150 | 155 | 161 | 165 | 168 |
| 100 | 104                                     | 110 | 115 | 116 | 132 | 139 | 146 | 153 | 159 | 164 | 169 | 172 |

**Table S4.** Yield Table: Trees per Acre

| Age | Douglas-fir 50-year Site Index (King's) |     |     |     |     |     |     |     |     |     |     |     |
|-----|-----------------------------------------|-----|-----|-----|-----|-----|-----|-----|-----|-----|-----|-----|
|     | 75                                      | 80  | 85  | 90  | 95  | 100 | 105 | 110 | 115 | 120 | 125 | 130 |
| 20  | 368                                     | 368 | 368 | 368 | 368 | 368 | 368 | 368 | 368 | 368 | 368 | 368 |
| 25  | 368                                     | 368 | 368 | 368 | 368 | 368 | 368 | 368 | 367 | 367 | 367 | 367 |
| 30  | 368                                     | 368 | 368 | 368 | 368 | 368 | 367 | 367 | 367 | 367 | 367 | 366 |
| 35  | 365                                     | 365 | 364 | 363 | 357 | 355 | 353 | 350 | 357 | 355 | 353 | 337 |
| 40  | 362                                     | 361 | 360 | 359 | 345 | 334 | 323 | 314 | 335 | 330 | 323 | 306 |
| 45  | 359                                     | 358 | 356 | 355 | 306 | 296 | 288 | 276 | 313 | 305 | 295 | 277 |
| 50  | 356                                     | 355 | 353 | 350 | 277 | 268 | 258 | 251 | 292 | 281 | 269 | 251 |
| 55  | 354                                     | 351 | 349 | 345 | 254 | 245 | 238 | 229 | 271 | 259 | 246 | 228 |
| 60  | 351                                     | 348 | 343 | 336 | 235 | 226 | 220 | 213 | 252 | 238 | 225 | 208 |
| 65  | 347                                     | 340 | 335 | 327 | 218 | 211 | 204 | 198 | 234 | 220 | 207 | 191 |
| 70  | 341                                     | 333 | 327 | 317 | 204 | 198 | 192 | 186 | 217 | 204 | 191 | 176 |
| 75  | 334                                     | 326 | 318 | 308 | 192 | 186 | 180 | 175 | 203 | 190 | 177 | 170 |
| 80  | 328                                     | 318 | 310 | 299 | 182 | 176 | 171 | 166 | 190 | 177 | 165 | 158 |
| 85  | 321                                     | 311 | 302 | 290 | 173 | 168 | 162 | 158 | 178 | 166 | 155 | 151 |
| 90  | 314                                     | 304 | 293 | 281 | 165 | 160 | 155 | 150 | 168 | 156 | 149 | 146 |
| 95  | 306                                     | 293 | 283 | 273 | 158 | 153 | 148 | 144 | 159 | 147 | 144 | 140 |
| 100 | 294                                     | 283 | 273 | 264 | 152 | 147 | 142 | 138 | 150 | 142 | 137 | 134 |

**Table S5.** Yield Table: Basal Area (sq. ft. per acre)

| Age | Douglas-fir 50-year Site Index (King's) |     |     |     |     |     |     |     |     |     |     |     |
|-----|-----------------------------------------|-----|-----|-----|-----|-----|-----|-----|-----|-----|-----|-----|
|     | 75                                      | 80  | 85  | 90  | 95  | 100 | 105 | 110 | 115 | 120 | 125 | 130 |
| 20  | 42                                      | 45  | 47  | 50  | 68  | 71  | 75  | 79  | 82  | 86  | 90  | 93  |
| 25  | 62                                      | 66  | 70  | 73  | 110 | 115 | 120 | 125 | 130 | 135 | 140 | 145 |
| 30  | 83                                      | 88  | 92  | 96  | 152 | 159 | 165 | 171 | 177 | 184 | 190 | 196 |
| 35  | 103                                     | 108 | 113 | 118 | 189 | 196 | 202 | 208 | 219 | 225 | 231 | 228 |
| 40  | 122                                     | 128 | 133 | 138 | 222 | 223 | 225 | 227 | 248 | 252 | 256 | 250 |
| 45  | 140                                     | 146 | 152 | 158 | 233 | 235 | 237 | 237 | 272 | 274 | 274 | 267 |
| 50  | 157                                     | 164 | 170 | 176 | 244 | 246 | 246 | 248 | 290 | 290 | 288 | 279 |
| 55  | 174                                     | 181 | 187 | 193 | 253 | 255 | 257 | 257 | 304 | 301 | 297 | 288 |
| 60  | 189                                     | 196 | 202 | 206 | 261 | 262 | 265 | 267 | 314 | 309 | 304 | 294 |
| 65  | 203                                     | 209 | 214 | 217 | 268 | 270 | 271 | 274 | 321 | 315 | 308 | 297 |
| 70  | 214                                     | 220 | 225 | 227 | 275 | 277 | 279 | 281 | 326 | 319 | 312 | 300 |
| 75  | 225                                     | 230 | 234 | 236 | 280 | 283 | 284 | 286 | 330 | 322 | 314 | 312 |
| 80  | 235                                     | 239 | 243 | 244 | 286 | 288 | 290 | 293 | 334 | 325 | 316 | 314 |
| 85  | 244                                     | 247 | 250 | 251 | 291 | 293 | 295 | 297 | 336 | 327 | 319 | 321 |
| 90  | 252                                     | 255 | 257 | 257 | 296 | 299 | 300 | 302 | 337 | 328 | 326 | 329 |
| 95  | 257                                     | 259 | 261 | 262 | 300 | 303 | 305 | 306 | 338 | 329 | 332 | 334 |
| 100 | 260                                     | 262 | 264 | 266 | 305 | 307 | 309 | 311 | 339 | 333 | 334 | 339 |

**Table S6.** Yield Table: Quadratic Mean Diameter (inches)

| Age | Douglas-fir 50-year Site Index (King's) |      |      |      |      |      |      |      |      |      |      |      |
|-----|-----------------------------------------|------|------|------|------|------|------|------|------|------|------|------|
|     | 75                                      | 80   | 85   | 90   | 95   | 100  | 105  | 110  | 115  | 120  | 125  | 130  |
| 20  | 4.6                                     | 4.7  | 4.9  | 5.0  | 5.8  | 6.0  | 6.1  | 6.3  | 6.4  | 6.5  | 6.7  | 6.8  |
| 25  | 5.6                                     | 5.7  | 5.9  | 6.0  | 7.4  | 7.6  | 7.7  | 7.9  | 8.0  | 8.2  | 8.4  | 8.5  |
| 30  | 6.4                                     | 6.6  | 6.8  | 6.9  | 8.7  | 8.9  | 9.1  | 9.3  | 9.4  | 9.6  | 9.8  | 9.9  |
| 35  | 7.2                                     | 7.4  | 7.5  | 7.7  | 9.9  | 10.1 | 10.2 | 10.4 | 10.6 | 10.8 | 11.0 | 11.1 |
| 40  | 7.9                                     | 8.0  | 8.2  | 8.4  | 10.9 | 11.1 | 11.3 | 11.5 | 11.6 | 11.9 | 12.0 | 12.3 |
| 45  | 8.5                                     | 8.7  | 8.9  | 9.0  | 11.8 | 12.0 | 12.3 | 12.5 | 12.6 | 12.8 | 13.1 | 13.3 |
| 50  | 9.0                                     | 9.2  | 9.4  | 9.6  | 12.7 | 13.0 | 13.2 | 13.5 | 13.5 | 13.7 | 14.0 | 14.3 |
| 55  | 9.5                                     | 9.7  | 9.9  | 10.1 | 13.5 | 13.8 | 14.1 | 14.3 | 14.3 | 14.6 | 14.9 | 15.2 |
| 60  | 9.9                                     | 10.2 | 10.4 | 10.6 | 14.3 | 14.6 | 14.9 | 15.2 | 15.1 | 15.4 | 15.7 | 16.1 |
| 65  | 10.4                                    | 10.6 | 10.8 | 11.0 | 15.0 | 15.3 | 15.6 | 15.9 | 15.9 | 16.2 | 16.5 | 16.9 |
| 70  | 10.7                                    | 11.0 | 11.2 | 11.5 | 15.7 | 16.0 | 16.3 | 16.6 | 16.6 | 16.9 | 17.3 | 17.7 |
| 75  | 11.1                                    | 11.4 | 11.6 | 11.9 | 16.4 | 16.7 | 17.0 | 17.3 | 17.3 | 17.6 | 18.0 | 18.4 |
| 80  | 11.5                                    | 11.7 | 12.0 | 12.2 | 17.0 | 17.3 | 17.6 | 18.0 | 17.9 | 18.3 | 18.7 | 19.1 |
| 85  | 11.8                                    | 12.1 | 12.3 | 12.6 | 17.6 | 17.9 | 18.3 | 18.6 | 18.6 | 19.0 | 19.4 | 19.7 |
| 90  | 12.1                                    | 12.4 | 12.7 | 12.9 | 18.1 | 18.5 | 18.8 | 19.2 | 19.2 | 19.6 | 20.0 | 20.3 |
| 95  | 12.4                                    | 12.7 | 13.0 | 13.3 | 18.7 | 19.0 | 19.4 | 19.8 | 19.8 | 20.2 | 20.6 | 20.9 |
| 100 | 12.7                                    | 13.0 | 13.3 | 13.6 | 19.2 | 19.6 | 19.9 | 20.3 | 20.4 | 20.8 | 21.2 | 21.5 |

**Table S7.** Yield Table: Cubic volume including top and stump (hundreds of cubic feet per acre)

| Age | Douglas-fir 50-year Site Index (King's) |       |       |       |       |       |       |       |       |       |       |       |
|-----|-----------------------------------------|-------|-------|-------|-------|-------|-------|-------|-------|-------|-------|-------|
|     | 75                                      | 80    | 85    | 90    | 95    | 100   | 105   | 110   | 115   | 120   | 125   | 130   |
| 20  | 6.3                                     | 7.0   | 7.9   | 8.9   | 16.8  | 17.7  | 18.3  | 18.9  | 19.6  | 20.3  | 21.5  | 23.7  |
| 25  | 14.3                                    | 16.1  | 17.5  | 18.6  | 28.3  | 29.8  | 31.2  | 33.1  | 36.2  | 38.8  | 40.9  | 42.8  |
| 30  | 20.3                                    | 21.3  | 23.5  | 26.5  | 42.5  | 45.2  | 48.4  | 52.3  | 55.7  | 58.2  | 60.6  | 62.9  |
| 35  | 27.3                                    | 29.7  | 31.3  | 32.5  | 57.1  | 60.7  | 64.8  | 68.9  | 74.3  | 77.3  | 79.7  | 79.7  |
| 40  | 33.9                                    | 37.3  | 40.8  | 42.3  | 72.2  | 74.4  | 77.2  | 80.2  | 89.0  | 92.0  | 94.1  | 93.7  |
| 45  | 41.3                                    | 43.9  | 45.6  | 48.2  | 80.4  | 83.7  | 86.7  | 88.6  | 103.1 | 105.4 | 106.7 | 105.8 |
| 50  | 48.1                                    | 52.2  | 55.8  | 57.8  | 88.6  | 91.8  | 94.5  | 97.5  | 115.4 | 116.8 | 118.0 | 116.5 |
| 55  | 55.5                                    | 58.7  | 61.0  | 63.7  | 96.2  | 99.9  | 103.5 | 105.5 | 125.9 | 127.1 | 127.5 | 125.0 |
| 60  | 60.8                                    | 65.3  | 68.8  | 71.6  | 102.9 | 106.6 | 110.6 | 114.3 | 135.2 | 135.7 | 135.3 | 133.0 |
| 65  | 68.6                                    | 72.2  | 74.8  | 76.2  | 109.9 | 114.2 | 117.6 | 121.2 | 142.8 | 143.1 | 142.5 | 139.8 |
| 70  | 73.9                                    | 76.8  | 80.4  | 82.7  | 115.6 | 120.5 | 124.7 | 128.2 | 149.9 | 149.6 | 148.7 | 146.0 |
| 75  | 78.8                                    | 82.6  | 85.5  | 87.4  | 121.8 | 126.5 | 130.7 | 134.5 | 156.5 | 155.6 | 154.3 | 155.6 |
| 80  | 84.2                                    | 87.8  | 90.4  | 92.0  | 127.2 | 132.5 | 136.9 | 141.3 | 162.0 | 161.3 | 159.8 | 161.3 |
| 85  | 88.7                                    | 92.3  | 95.3  | 96.9  | 133.0 | 137.9 | 142.3 | 147.0 | 167.6 | 166.7 | 165.7 | 169.6 |
| 90  | 93.4                                    | 96.7  | 99.3  | 100.7 | 137.9 | 143.5 | 148.4 | 152.4 | 172.3 | 170.8 | 173.1 | 177.3 |
| 95  | 97.2                                    | 99.6  | 103.2 | 104.6 | 142.4 | 148.8 | 153.3 | 158.3 | 176.3 | 175.3 | 180.3 | 184.3 |
| 100 | 99.6                                    | 102.8 | 105.7 | 107.8 | 147.2 | 153.2 | 158.6 | 163.4 | 180.3 | 181.3 | 185.1 | 190.4 |

**Table S8.** Yield Table: Boardfoot Volume, Scribner Rule (thousands of boardfeet per acre) \*

| Age | Douglas-fir 50-year Site Index (King's) |      |      |      |      |      |      |      |      |      |      |      |
|-----|-----------------------------------------|------|------|------|------|------|------|------|------|------|------|------|
|     | 75                                      | 80   | 85   | 90   | 95   | 100  | 105  | 110  | 115  | 120  | 125  | 130  |
| 20  | 0.0                                     | 0.0  | 0.0  | 0.0  | 0.0  | 0.0  | 0.0  | 0.0  | 0.0  | 0.0  | 0.0  | 0.0  |
| 25  | 0.0                                     | 0.0  | 0.0  | 0.0  | 0.0  | 0.0  | 0.0  | 0.2  | 0.9  | 1.3  | 1.9  | 2.9  |
| 30  | 0.0                                     | 0.0  | 0.0  | 0.0  | 5.4  | 9.5  | 12.8 | 16.0 | 18.1 | 20.7 | 23.2 | 25.7 |
| 35  | 0.0                                     | 0.0  | 0.0  | 0.0  | 22.6 | 24.9 | 27.1 | 28.7 | 30.8 | 32.2 | 33.5 | 33.2 |
| 40  | 0.9                                     | 1.8  | 2.0  | 2.4  | 29.9 | 30.4 | 32.1 | 33.1 | 37.3 | 38.5 | 39.4 | 39.1 |
| 45  | 3.7                                     | 5.1  | 8.8  | 13.0 | 33.5 | 34.6 | 36.3 | 37.1 | 42.7 | 43.3 | 43.9 | 43.0 |
| 50  | 11.5                                    | 15.2 | 18.8 | 21.2 | 36.9 | 37.8 | 38.5 | 39.8 | 46.9 | 47.0 | 47.2 | 46.3 |
| 55  | 18.4                                    | 21.0 | 23.8 | 25.6 | 39.1 | 40.2 | 41.3 | 42.0 | 50.3 | 50.4 | 50.6 | 49.8 |
| 60  | 23.2                                    | 25.7 | 28.2 | 29.8 | 40.8 | 42.5 | 43.7 | 45.0 | 54.0 | 54.1 | 54.3 | 53.6 |
| 65  | 28.0                                    | 29.7 | 31.3 | 32.0 | 43.5 | 45.0 | 46.5 | 48.4 | 57.5 | 57.6 | 57.9 | 57.1 |
| 70  | 30.6                                    | 32.3 | 33.6 | 34.7 | 46.0 | 48.0 | 50.2 | 51.8 | 61.1 | 61.4 | 61.2 | 60.8 |
| 75  | 33.2                                    | 34.7 | 35.9 | 37.0 | 48.6 | 51.0 | 53.1 | 55.5 | 64.8 | 64.8 | 64.8 | 66.1 |
| 80  | 35.5                                    | 36.6 | 38.1 | 38.6 | 51.3 | 54.3 | 56.6 | 59.2 | 67.8 | 67.9 | 68.0 | 69.4 |
| 85  | 37.3                                    | 38.5 | 39.6 | 40.1 | 54.3 | 57.2 | 59.9 | 62.2 | 71.0 | 71.1 | 71.7 | 73.6 |
| 90  | 38.9                                    | 40.0 | 41.1 | 41.3 | 57.3 | 60.7 | 63.2 | 65.3 | 73.8 | 74.1 | 75.5 | 78.2 |
| 95  | 40.0                                    | 41.2 | 41.9 | 42.7 | 60.2 | 63.6 | 65.6 | 68.5 | 76.6 | 76.6 | 79.2 | 81.4 |
| 100 | 40.8                                    | 42.1 | 42.8 | 43.6 | 63.0 | 66.1 | 68.6 | 71.3 | 79.0 | 80.1 | 82.3 | 84.0 |

\* Scribner volume calculated for all trees  $\geq 9''$  DBH to a minimum 6'' top diameter inside bark, with a 1' stump.

**Table S9.** Yield Table: Stand Density Index

| Age | Douglas-fir 50-year Site Index (King's) |     |     |     |     |     |     |     |     |     |     |     |
|-----|-----------------------------------------|-----|-----|-----|-----|-----|-----|-----|-----|-----|-----|-----|
|     | 75                                      | 80  | 85  | 90  | 95  | 100 | 105 | 110 | 115 | 120 | 125 | 130 |
| 20  | 105                                     | 110 | 116 | 121 | 154 | 160 | 167 | 173 | 179 | 186 | 192 | 198 |
| 25  | 144                                     | 151 | 158 | 164 | 227 | 235 | 243 | 252 | 259 | 267 | 276 | 283 |
| 30  | 181                                     | 189 | 197 | 204 | 295 | 305 | 314 | 324 | 333 | 343 | 352 | 361 |
| 35  | 215                                     | 224 | 232 | 240 | 349 | 358 | 367 | 374 | 392 | 400 | 408 | 400 |
| 40  | 246                                     | 255 | 264 | 272 | 394 | 393 | 393 | 394 | 428 | 433 | 436 | 424 |
| 45  | 274                                     | 284 | 293 | 301 | 400 | 400 | 401 | 397 | 455 | 455 | 452 | 438 |
| 50  | 301                                     | 311 | 320 | 328 | 406 | 406 | 404 | 404 | 472 | 468 | 462 | 444 |
| 55  | 325                                     | 335 | 344 | 352 | 411 | 411 | 411 | 409 | 483 | 475 | 466 | 447 |
| 60  | 347                                     | 357 | 365 | 369 | 416 | 414 | 415 | 416 | 489 | 478 | 466 | 446 |
| 65  | 367                                     | 374 | 380 | 383 | 418 | 418 | 417 | 418 | 490 | 478 | 463 | 443 |
| 70  | 382                                     | 388 | 394 | 395 | 422 | 421 | 421 | 421 | 490 | 475 | 460 | 440 |
| 75  | 396                                     | 401 | 405 | 405 | 423 | 424 | 422 | 423 | 488 | 472 | 456 | 450 |
| 80  | 408                                     | 412 | 415 | 413 | 425 | 426 | 425 | 426 | 485 | 469 | 452 | 446 |
| 85  | 418                                     | 421 | 423 | 420 | 428 | 427 | 426 | 427 | 482 | 465 | 450 | 450 |
| 90  | 427                                     | 429 | 429 | 426 | 429 | 430 | 428 | 428 | 478 | 461 | 455 | 456 |
| 95  | 433                                     | 431 | 432 | 430 | 430 | 431 | 430 | 429 | 474 | 456 | 458 | 457 |
| 100 | 433                                     | 433 | 433 | 433 | 432 | 432 | 431 | 432 | 470 | 458 | 455 | 459 |

**Table S10.** Yield Table: Curtis Relative Density

| Age | Douglas-fir 50-year Site Index (King's) |      |      |      |      |      |      |      |      |      |      |      |
|-----|-----------------------------------------|------|------|------|------|------|------|------|------|------|------|------|
|     | 75                                      | 80   | 85   | 90   | 95   | 100  | 105  | 110  | 115  | 120  | 125  | 130  |
| 20  | 19.8                                    | 20.7 | 21.5 | 22.4 | 28.2 | 29.2 | 30.4 | 31.4 | 32.4 | 33.5 | 34.7 | 35.7 |
| 25  | 26.5                                    | 27.6 | 28.7 | 29.7 | 40.5 | 41.7 | 43.1 | 44.5 | 45.7 | 47.1 | 48.4 | 49.6 |
| 30  | 32.7                                    | 34.1 | 35.4 | 36.6 | 51.6 | 53.2 | 54.8 | 56.3 | 57.8 | 59.4 | 60.9 | 62.3 |
| 35  | 38.4                                    | 39.8 | 41.1 | 42.4 | 60.2 | 61.7 | 63.1 | 64.3 | 67.2 | 68.5 | 69.8 | 68.3 |
| 40  | 43.5                                    | 45.0 | 46.4 | 47.8 | 67.3 | 67.1 | 66.8 | 66.9 | 72.7 | 73.3 | 73.7 | 71.5 |
| 45  | 48.2                                    | 49.7 | 51.2 | 52.5 | 67.8 | 67.6 | 67.6 | 66.8 | 76.6 | 76.4 | 75.9 | 73.2 |
| 50  | 52.5                                    | 54.1 | 55.5 | 56.8 | 68.3 | 68.3 | 67.7 | 67.6 | 78.9 | 78.1 | 76.9 | 73.8 |
| 55  | 56.4                                    | 58.0 | 59.4 | 60.6 | 68.8 | 68.6 | 68.4 | 67.9 | 80.2 | 78.7 | 77.1 | 73.8 |
| 60  | 59.9                                    | 61.5 | 62.6 | 63.2 | 69.1 | 68.7 | 68.7 | 68.6 | 80.7 | 78.7 | 76.6 | 73.2 |
| 65  | 63.1                                    | 64.1 | 65.1 | 65.3 | 69.2 | 69.1 | 68.6 | 68.6 | 80.6 | 78.3 | 75.8 | 72.4 |
| 70  | 65.4                                    | 66.3 | 67.1 | 67.2 | 69.4 | 69.1 | 69.0 | 68.9 | 80.1 | 77.6 | 74.9 | 71.4 |
| 75  | 67.5                                    | 68.2 | 68.7 | 68.6 | 69.3 | 69.3 | 68.9 | 68.8 | 79.4 | 76.7 | 73.9 | 72.8 |
| 80  | 69.3                                    | 69.8 | 70.2 | 69.8 | 69.4 | 69.3 | 69.0 | 69.0 | 78.8 | 75.9 | 72.9 | 71.9 |
| 85  | 70.9                                    | 71.2 | 71.3 | 70.7 | 69.5 | 69.3 | 69.1 | 68.9 | 77.9 | 75.0 | 72.4 | 72.3 |
| 90  | 72.3                                    | 72.3 | 72.2 | 71.4 | 69.6 | 69.5 | 69.1 | 68.9 | 77.0 | 74.0 | 72.9 | 73.0 |
| 95  | 73.0                                    | 72.5 | 72.5 | 72.0 | 69.5 | 69.5 | 69.2 | 68.9 | 76.1 | 73.1 | 73.3 | 73.0 |
| 100 | 72.9                                    | 72.5 | 72.5 | 72.2 | 69.6 | 69.5 | 69.2 | 69.1 | 75.2 | 73.1 | 72.6 | 73.1 |



### Mapping Riparian Management Zone Buffers in Oregon and Washington

Constraints on harvest activities near streams are handled differently for each State's forest practice regulations [12,13], as well as under the FSC-US Standard for the Pacific Coast [14]. The width of RMZs are displayed in **Table S11**.

**Table S11.** Buffer widths for Riparian Management Zones under FPA and FSC Rules (in feet)

| Stream Type                                     | Buffer Type | Oregon      |     |     | Washington <sup>1</sup> |     |    | FSC-US                     |
|-------------------------------------------------|-------------|-------------|-----|-----|-------------------------|-----|----|----------------------------|
|                                                 |             | Stream Size |     |     | Site Class <sup>2</sup> |     |    | Pacific Coast <sup>3</sup> |
|                                                 |             | SM          | MED | LRG | II                      | III | IV |                            |
| Type F<br>(fish-bearing)                        | core        | 20          | 20  | 20  | 50                      | 50  | 50 | 50                         |
|                                                 | inner       | 30          | 50  | 80  | 78                      | 55  | 33 | 150                        |
|                                                 | outer       | --          | --  | --  | 42                      | 35  | 27 | --                         |
| Type SSBT<br>(salmon, steelhead,<br>bull trout) | core        | 20          | 20  | --  | --                      | --  | -- | 50                         |
|                                                 | inner       | 20          | 30  | --  | --                      | --  | -- | 150                        |
|                                                 | outer       | 20          | 30  | --  | --                      | --  | -- | --                         |
| Type N/Np<br>(non-fish, perennial)              | core        | 0           | 20  | 20  | 50 <sup>4</sup>         | 50  | 50 | 25                         |
|                                                 | inner       | 0           | 30  | 50  | 0                       | 0   | 0  | 75                         |
|                                                 | outer       | --          | --  | --  | 0                       | 0   | 0  | --                         |
| Type Ns<br>(non-fish, seasonal)                 | core        | --          | --  | --  | --                      | --  | -- | --                         |
|                                                 | inner       | --          | --  | --  | --                      | --  | -- | 75                         |
|                                                 | outer       | --          | --  | --  | --                      | --  | -- | --                         |

<sup>1</sup> Washington RMZ widths also differ whether stream bank-full width is above or below 10 feet. All buffers shown here, and all RMZs modeled in this study assume a > 10-foot bank-full width.

<sup>2</sup> Site Class categorizes forest growth potential using Douglas-fir 50-year Site Index (height of dominant trees at 50 years of age): II = 35.1–41.1 m (115–135 ft); III = 29.0–35.1 m (95–115 ft); IV = 22.9–29.0 m (75–95 ft)

<sup>3</sup> FSC rules for the Pacific Coast do not identify a 'core' no-touch buffer zone, but rather distinguish inner and outer buffer zones for Category A (fish-bearing) and Category B (perennial non-fish-bearing) streams. FSC limits harvests to single-tree selection in inner buffers, and to single-tree or group selection in outer buffers [14]. Because neither of these harvest systems are implemented in this study, all FSC buffer areas are modeled as no-touch (comparable to the core buffers of OR and WA ~FPA scenarios).

<sup>4</sup> In Washington, Type Np (non-fish perennial) stream buffers are defined with additional criteria described below.

Geospatial layers identifying stream locations, stream types and site class were obtained from the Washington Department of Natural Resources, and a similar data layer for including stream locations, stream type and size was also obtained from the Oregon Department of Forestry. Buffers on streams were created using a Geographic Information System (GIS).

In Washington State, non-fish perennial stream (Type Np) RMZs are designated based on the location of sensitive sites and the stream's intersection with other streams. A 56-foot-radius buffer was assigned surrounding sensitive sites defined as a headwater spring or an intersection of two or more Type Np streams. Additionally, the length of 50 foot no-touch buffers applied to Np streams in cases where they intersect with a Type S (shorelines) or Type F (fish-bearing) stream are described in

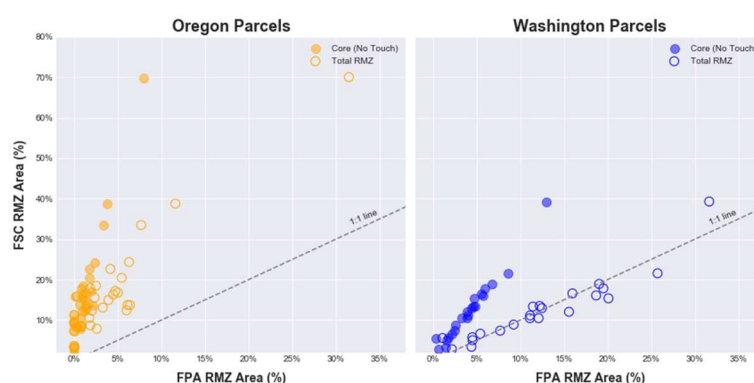

**Figure S7.** Comparisons of the area encumbered by FSC and FPA RMZs for Oregon and Washington.

**Table S12.** The total area encumbered by no-touch and lighter-touch RMZ areas for FPA and FSC rules are visualized in **Figure S7**.

#### Silvicultural Prescriptions for RMZs in Washington State under FPA Rules

All core RMZ buffer areas in Washington State are modeled as no-touch under the FPA scenarios. Only Type F streams have additional RMZ constraints beyond the core no-touch buffer. The outer RMZ buffer area in Washington requires the retention of at least 20 conifer TPA with DBH  $\geq 20''$ . For the inner RMZ buffer area, we used an online tool produced by the Washington Department of Natural Resources [15] to estimate the green-tree retention during a proposed harvest to meet a desired future condition for the stocking of conifer trees of 325 sq. ft. per acre at age 140. With this tool, we identified the minimum retention requirements for a “thin from below” treatment in the Inner RMZ buffer area for Type F streams.

**Table S12.** RMZ length for 50-foot core (no-touch) buffer area for Type Np streams that intersect with Type S or Type F streams, Washington State.

| Length of Type Np stream | Length of 50' Riparian Management Area             |
|--------------------------|----------------------------------------------------|
| > 1,000'                 | 500'                                               |
| 300' - 1,000'            | 50% of entire length or 300', whichever is greater |
| $\geq 300'$              | The entire length                                  |

**Table S13.** Minimum Retention for Inner RMZ Buffers on Type F streams, Washington State

| Site Class | Harvest Age (years) | Green-Tree Retention * (trees per acre) |
|------------|---------------------|-----------------------------------------|
| II         | 35                  | 57                                      |
| III        | 40                  | 60                                      |
| IV         | 40                  | 66                                      |

\* Retention is for conifer trees with DBH  $\geq 12$ , and must be at least 57 conifer TPA.

#### Silvicultural Prescriptions for RMZs in Oregon under FPA Rules

All core RMZ buffer areas in Oregon are modeled as no-touch under the FPA scenarios. Retention requirements in Oregon FPA rules are defined in terms of retention for a pre-defined length of stream (e.g., 1,000 ft). These retention requirements were converted to trees per acre and basal area per acre by dividing the specified retention by the area that would fall within each buffer type for the pre-defined length of stream.

In practice, these retention requirements are enforced at the level of the entire RMZ rather than for separate RMZ buffer areas. To simplify growth-and-yield simulations, we model each RMZ buffer area independently and do not count retention in other RMZ buffers towards a total value. This approach does not follow the common practice of “packing” retention into core and inner buffer areas, and thus is likely to represent a higher level of green tree retention than is required by Oregon FPA rules. For example, we model all core RMZ buffers as no-touch, and require all inner RMZ buffers to meet the per-acre retention requirements without consideration of the retention neighboring core buffers.

For Type F and Type N streams, Oregon FPA rules following a branching logic approach. Each stream size in these types has a pre-defined “Standard Target.” If, at the time of the proposed harvest, a stand is at or above the Basal Area Standard Target, the retention must meet the levels shown in **Table S14**. If a stand falls between 50-100% of the Basal Area Standard Target, the retention must meet the levels shown in **Table S15**. If the stand does not currently meet or exceed these retention levels, no harvest is permitted. Harvests within RMZ buffers are modeled as a “thin from below,” removing the smallest trees from the stand’s diameter distribution first, while enforcing the minimum TPA and DBH requirements for retention.

**Table S14.** Oregon FPA “Standard Targets” for Retention in Inner RMZ Buffers

| Retention Type | Type F | Type N | Type SSBT <sup>1</sup> |
|----------------|--------|--------|------------------------|
|----------------|--------|--------|------------------------|

|                                               | <i>SM</i>       | <i>MED</i> | <i>LG</i> | <i>SM</i>       | <i>MED</i> | <i>LG</i> | <i>SM</i> | <i>MED</i> |
|-----------------------------------------------|-----------------|------------|-----------|-----------------|------------|-----------|-----------|------------|
| Basal Area <sup>2</sup><br>(sq. ft. per acre) | 35              | 75         | 100       | -- <sup>4</sup> | 44         | 56        | 81        | 100        |
| Trees per Acre <sup>3</sup>                   | -- <sup>5</sup> | 19         | 18        | --              | 9          | 19        | 18        | 22         |
| Minimum DBH <sup>3</sup><br>(inches)          | --              | 8          | 11        | --              | 8          | 11        | 8         | 8          |

<sup>1</sup> Type SSBT Streams have only one set of retention targets, they do not another retention option as is the case with Type F and Type N streams. If a stand does not meet SSBT targets at the time of proposed harvest, no harvest is permitted.

<sup>2</sup> FPA rules for Type F and Type N streams count basal area in live conifer trees with DBH  $\geq 6''$ . For Type SSBT streams, the basal area target may include any species of trees with DBH  $\geq 6''$

<sup>3</sup> The requirements for the minimum number (TPA) and size (DBH) of retained trees refers to live conifers only. Although exceptions exist in Oregon FPA rules for different stream types and sizes, snags and hardwood trees are not counted toward retention requirements as modeled in this study.

<sup>4</sup> Small Type N streams do not have specific retention requirements for inner RMZ buffers. These zones are modeled the same way as non-riparian areas.

<sup>5</sup> Small Type F streams have no specific tree size or count requirements for inner RMZ buffers.

**Table S15.** Oregon FPA “Alternative Targets” for Retention in Inner RMZ Buffers

| Retention Type                       | Type F    |            |           | Type N          |            |           |
|--------------------------------------|-----------|------------|-----------|-----------------|------------|-----------|
|                                      | <i>SM</i> | <i>MED</i> | <i>LG</i> | <i>SM</i>       | <i>MED</i> | <i>LG</i> |
| Trees per Acre <sup>1</sup>          | 61        | 63         | 66        | -- <sup>2</sup> | 61         | 63        |
| Minimum DBH <sup>1</sup><br>(inches) | 6         | 6          | 6         | --              | 6          | 6         |

<sup>1</sup> The requirements for the minimum number (TPA) and size (DBH) of retained trees refers to live conifers only.

<sup>2</sup> Small Type N streams do not have any specific retention requirements for inner RMZ buffers. These zones are modeled the same way as non-riparian areas.

## References

1. Keyser, C. *Pacific Northwest Coast (PN) Variant Overview—Forest Vegetation Simulator*; U. S. Department of Agriculture, Forest Service, Forest Management Service Center: Fort Collins, CO, 2017; p. 67.
2. Wang, Y. Volume Estimator Library Equations 2017.
3. Waddell, K. L.; Campbell, K.; Kuegler, O.; Christensen, G. FIA Volume Equation documentation updated on 9-19-2014 2014.
4. Stand Management Cooperative SMC Plantation Yield Calculator Available online: <http://www.sefs.washington.edu/research.smc/research/pyc/index.html> (accessed on May 4, 2018).
5. Curtis, R. O.; Marshall, D. D. *Levels-of-growing-stock cooperative study in Douglas-fir: report no. 14—Stampede Creek, 30-year results.*; U.S. Department of Agriculture, Forest Service, Pacific Northwest Research Station: Portland, OR, 2002; p. 77.
6. Williamson, R. L. *Growth and yield records from well-stocked stands of Douglas-fir*; U.S. Department of Agriculture, Forest Service, Pacific Northwest Forest and Range Experiment Station: Portland, OR, 1963; p. 27.
7. Chambers, C. J. *Empirical Growth and Yield Tables for the Douglas Fir Zone*; Washington Department of Natural Resources: Olympia, WA, 1980; p. 56.
8. Curtis, R. O.; Clendenen, G. W.; Reukema, D. L.; DeMars, D. J. *Yield Tables for Managed Stands of Coast Douglas-Fir*; USDA Forest Service, Pacific Northwest Forest and Range Experiment Station: Portland, OR, 1982; p. 182.
9. McArdle, R. E.; Meyer, W. H.; Bruce, D. *The Yield of Douglas Fir in the Pacific Northwest*; USDA Forest Service, Pacific Northwest Forest and Range Experiment Station: Washington, D.C., 1961; p. 74;.
10. Mitchell, K. J.; Cameron, I. R. *Managed stand yield tables for coastal Douglas-fir: initial density and precommercial thinning*; British Columbia Ministry of Forests, Research Branch: Victoria, B.C, 1985; p. 81.
11. Schumacher, F. X. *Yield, stand and volume tables for Douglas fir in California*; University of California, Berkeley, Agricultural Experiment Station: Berkeley, CA, 1930; p. 41.
12. Washington State Legislature *Washington State Forest Practices Rules*; Vol. 222.
13. Oregon Secretary of State *Oregon Forest Practice Rules*; Vol. Chapter 629;
14. FSC-US *FSC-US Forest Management Standard (v1.0)*; Forest Stewardship Council International, 2012; p. 109.
15. Washington State Department of Natural Resources *Desired Future Condition Worksheet (Version 3.0)* Available online: <https://fortress.wa.gov/dnr/protection/dfc/DfcRun.aspx> (accessed on Jun 27, 2018).

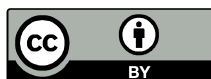

© 2018 by the authors. Licensee MDPI, Basel, Switzerland. This article is an open access article distributed under the terms and conditions of the Creative Commons Attribution (CC BY) license (<http://creativecommons.org/licenses/by/4.0/>).
